# Supplementary material
Source: PubMed Central journal article supplement (PMC2396678)
Supplement: 0802828105_Supplemental_PDF.pdf [file 0802828105_Supplemental_PDF.pdf]

# Supporting Information

Murata *et al.* 10.1073/pnas.0802828105

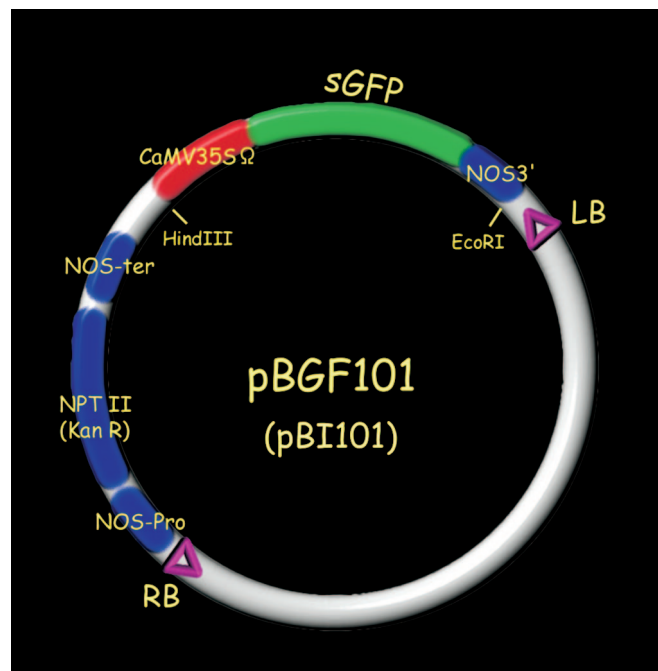

**Fig. S1.** Map of the binary vector pBGF101 used for *in planta* transformation. The GUS gene in pBI101 (1) has been replaced with the GFP (S65T) gene (2).

1. Jefferson RA, Kavanagh TA, Bevan MW (1987) GUS fusions:  $\beta$ -glucuronidase as a sensitive and versatile gene fusion marker in higher plants. *Embo J* 6:3901–3907.
2. Niwa Y, Hirano T, Yoshimoto K, Shimizu M, Kobayashi H (1999) Non-invasive quantitative detection and applications of non-toxic, S65T-type green fluorescent protein in living plants. *Plant J* 18:455–463.

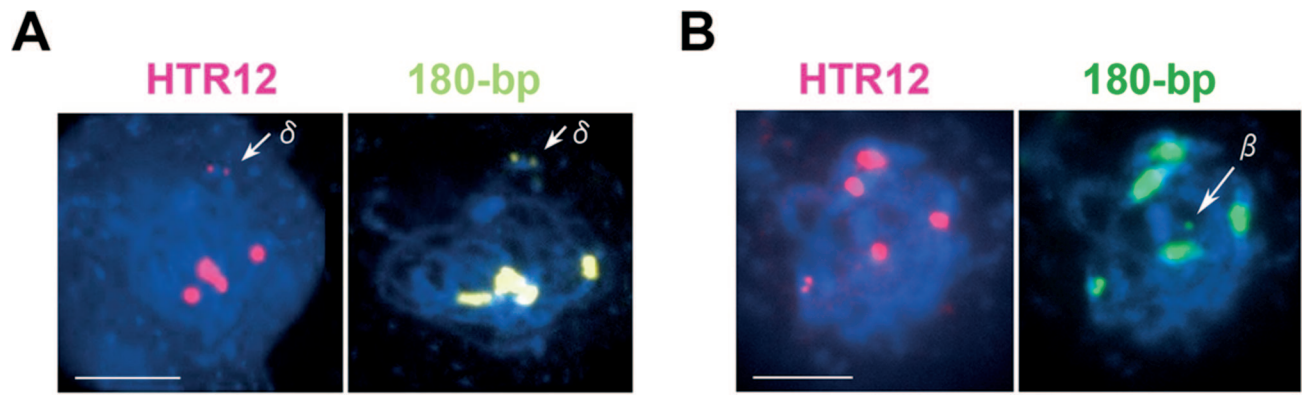

**Fig. S2.** HTR12-immunostaining and FISH analysis. (A) A pachytene cell of a  $Tr \delta$  plant carrying mini  $\delta$  following fluorescent immunolabeling using anti-HTR12 antibodies (pink) and FISH using 180-bp repeats (yellow). The arrows indicate mini  $\delta$ . (B) A pachytene cell of a plant carrying chromosome  $\beta$  following fluorescent immunolabeling using anti-HTR12 antibodies (pink) and FISH using 180-bp repeats (green) to the pachytene chromosomes. The arrow indicates the small 180-bp sites on chromosome  $\beta$ . (Scale bars: 5  $\mu\text{m}$ .)



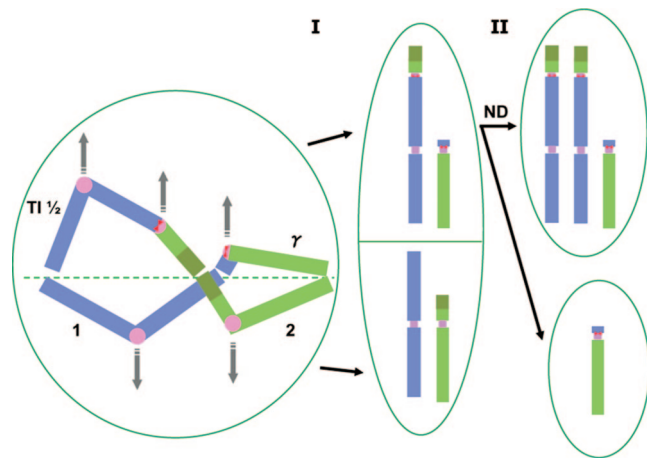

Fig. S4. Presumed chromosomal configuration and segregation at metaphase I to anaphase I and nondisjunction (ND) at the second division (II).
